# Supplementary material for: The Effect of Chinese Proficiency on Determining Temporal Adverb Position by Native Japanese Speakers Learning Chinese
Source: Frontiers journal article supplement (doi:10.3389/fpsyg.2021.783366), 2022-01-05
Supplement: Data_Sheet_1.pdf [file Data_Sheet_1.pdf]

## Appendix 1: Chinese stimulus sentences for Experiment 1

### APPENDIX 1: Chinese Stimulus Sentences for Experiment 1

*Note:* The following 12 sentences are examples of a temporal adverb positioned before the subject.

1. 昨天姐姐在食堂吃饭了。  
*Zuótiān jiějie zài shítáng chīfàn le.*  
“(My) elder sister had a meal at the restaurant yesterday.”
2. 前天早上弟弟在公园玩游戏了。  
*Qiántiān zǎoshang dìdì zài gōngyuán wán yóuxì le.*  
“(My) younger brother played the game in the park yesterday morning.”
3. 今天早上妹妹在教室上汉语课了。  
*Jīntiān zǎoshang mèimei zài jiàoshì shàng Hànyǔkè le.*  
“(My) younger sister had a Chinese lesson in the classroom this morning.”
4. 昨天上午妈妈在超市买牛奶了。  
*Zuótiān shàngwǔ māma zài chāoshì mǎi niúnnǎi le.*  
“(My) mother bought milk at the supermarket yesterday afternoon.”
5. 昨天晚上爸爸在家看电影了。  
*Zuótiān wǎnshang bàba zài jiā kàn diànyǐng le.*  
“(My) father watched a movie at home last night.”
6. 昨天下午哥哥在操场踢足球了。  
*Zuótiān xiàwǔ gēge zài cāochǎng tī zúqiú le.*  
“(My) elder brother played football in the playground yesterday afternoon.”
7. 今天上午姐姐在图书馆写作业了。  
*Jīntiān shàngwǔ jiějie zài túshūguǎn xiě zuòyè le.*  
“(My) elder sister did homework in the library this morning.”
8. 去年冬天弟弟在日本滑雪了。  
*Qùnián dōngtiān dìdì zài Rìběn huáxuě le.*  
“(My) younger brother skied in Japan last winter.”
9. 上个星期奶奶在饭店吃中国菜了。  
*Shàng ge xīngqī nǎinai zài fàndiàn chī Zhōngguócài le.*  
“(My) grandmother ate Chinese food at the restaurant last week.”
10. 去年爷爷在日本学日语了。  
*Qùnián yéye zài Rìběn xué Rìyǔ le.*  
“(My) grandfather studied Japanese in Japan last year.”

11. 前天晚上爸爸在公司开会了。

*Qiántiān wǎnshang bàba zài gōngsī kāi huì le.*

“(My) father had a meeting at the company last night.”

12. 前天哥哥在学校唱中文歌了。

*Qiántiān gēge zài xuéxiào chàng Zhōngwéngē le.*

“(My) elder brother sang a Chinese song at school the day before yesterday.”
